# Supplementary material for: Integration of Medical Services for Sporting Events with the Regional Emergency System During an Avalanche: A Case Report from the Alpine Ski World Cup
Source: Research Square preprint supplement (doi:10.21203/rs.3.rs-6264752/v1), 2025-03-31
Supplement: Supplementary file 1 [file 79bcd7d37f696b522a310577.xlsx]

## Sheet: Translated_Table
Table 1: Clinical Data and Outcomes of Avalanche Victims
Patient	Pathology and Vital Parameters on Scene	Evacuation	Hospital Pathway	Discharge
Paziente 1	Polytrauma with initial neurological impairment (GCS 10), later improved to GCS 15.	Direct transport to Parini Hospital in Aosta with a physician	Arrival at the ER at 13:28, with findings of a body temperature of 33°C and significantly elevated CPK levels	24 hours later
Paziente 2	Severe polytrauma + hypothermia (32°C) + hemodynamic instability (BP 85/50 mmHg, HR 110 bpm)	Transported to CTO in La Thuile. Stabilized with warm fluid infusion (500ml) + Tranexamic Acid (1g) and analgesia. Evacuated by helicopter	Arrival at the ER at 14:30, intubated and subsequently transferred to ICU	Still hospitalized in the Orthopedic ward at the time of this report
Paziente 3	Polytrauma with L2-L3-L4 fractures. Vital parameters: BP 130/80 mmHg, HR 90 bpm, SpO2 96%	Direct transport to Parini Hospital in Aosta	Arrival at the ER at 14:41, under observation in the Emergency Department	23 hours later
Paziente 4	Mild head trauma, L3-L4 vertebral fractures, rib and coccyx fractures	Transported to CTO in La Thuile. Vital parameters: BP 120/70 mmHg, HR 85 bpm, SpO2 98%	Arrival at the ER at 14:50, under observation in the Emergency Department	26 hours later
